# Supplementary material
Source: publisher figshare collection journal article supplement (https://springernature.figshare.com/ndownloader/files/15364262)
Supplement: Supplementary file 1 [file 15364262]

Additional file 2: TSAT and ferritin levels, by disease stage and prior treatment

TSAT levels (%) (Mean ± SD)

|  | History of ESA administration | Week 0 | Week 24 | Week 52 |
| --- | --- | --- | --- | --- |
| ND | No prior treatment | 26.35±11.95  （n=226） | 31.32±12.99  （n=88） | 31.66±12.21  （n=107） |
| Switching from EPO | 29.36±13.32  （n=107） | 30.91±15.62  （n=49） | 30.09±13.94  （n=60） |
| Switching from DA | 32.45±14.11  （n=150） | 35.16±18.37  （n=91） | 33.90±16.07  （n=80） |
| HD | No prior treatment | 29.47±14.73  （n=66） | 28.49±11.67  （n=36） | 25.02±9.86  （n=42） |
| Switching from EPO | 24.97±10.46  （n=399） | 28.23±12.71  （n=245） | 27.68±12.51  （n=296） |
| Switching from DA | 25.12±12.25  （n=407） | 26.37±11.57  （n=274） | 28.37±12.72  （n=272） |
| PD | No prior treatment | 34.72±10.38  （n=25） | 31.34±10.88  （n=23） | 30.44±14.34  （n=30） |
| Switching from EPO | 36.84±18.06  （n=8） | 34.99±17.02  （n=4） | 30.22±10.83  （n=3） |
| Switching from DA | 34.35±13.65  （n=119） | 31.08±10.83  （n=65） | 32.11±11.90  （n=77） |

Ferritin levels (ng/mL) (Mean ± SD）

|  | History of ESA administration | Week 0 | Week 24 | Week 52 |
| --- | --- | --- | --- | --- |
| ND | No prior treatment | 169.38±203.69  （n=287） | 148.20±171.69  （n=112） | 140.67±122.85  （n=130） |
| Switching from EPO | 144.88±137.18  （n=118） | 186.64±417.38  （n=62） | 165.56±247.09  （n=66） |
| Switching from DA | 163.86±192.42  （n=185） | 159.50±255.60  （n=110） | 139.95±125.69  （n=101） |
| HD | No prior treatment | 210.28±242.43  （n=82） | 155.16±168.84  （n=43） | 126.94±168.68  （n=53） |
| Switching from EPO | 126.80±134.60  （n=383） | 127.03±137.47  （n=260） | 123.32±119.54  （n=284） |
| Switching from DA | 147.83±199.47  （n=385） | 126.38±134.61  （n=247） | 126.18±119.86  （n=227） |
| PD | No prior treatment | 205.74±175.95  （n=35） | 168.61±135.47  （n=23） | 180.17±141.77  （n=28） |
| Switching from EPO | 138.77±120.34  （n=25） | 131.51±162.20  （n=17） | 227.46±474.79  （n=15） |
| Switching from DA | 151.27±108.96  （n=135） | 165.36±162.94  （n=75） | 154.32±165.50  （n=84） |

DA darbepoetin alfa; EPO erythropoietin; ESA erythropoiesis stimulating agents; HD hemodialysis; ND not on dialysis; PD peritoneal dialysis; SD standard deviation; TSAT transferrin saturation
